# Supplementary material for: Lithium, sodium and potassium picolyl complexes: syntheses, structures and bonding
Source: Royal Society of Chemistry journal article supplement (doi:10.1039/c4dt00808a), 2014-01-01
Supplement: c4dt00808a1.pdf [file c4dt00808a1.pdf]

**Lithium, sodium and potassium picolyl complexes: syntheses, structures  
and bonding**

Alan R. Kennedy,<sup>a</sup> Robert E. Mulvey,<sup>a</sup> Robert I. Urquhart <sup>a</sup> and Stuart D.  
Robertson <sup>a\*</sup>

[stuart.d.robertson@strath.ac.uk](mailto:stuart.d.robertson@strath.ac.uk)

<sup>a</sup> WestCHEM, Department of Pure and Applied Chemistry, University of  
Strathclyde, Glasgow, G1 1XL, UK.

**SUPPORTING INFORMATION**

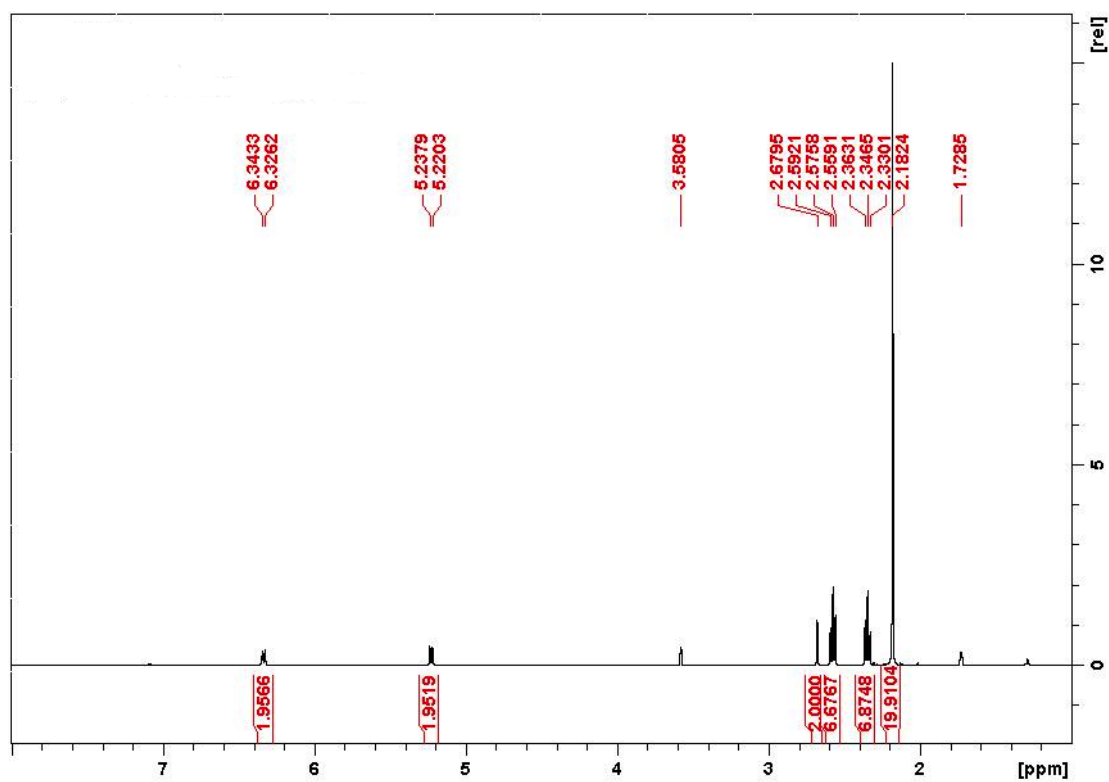

**Fig S1**  $^1\text{H}$  NMR spectrum of complex **1** in  $\text{d}_8\text{-THF}$

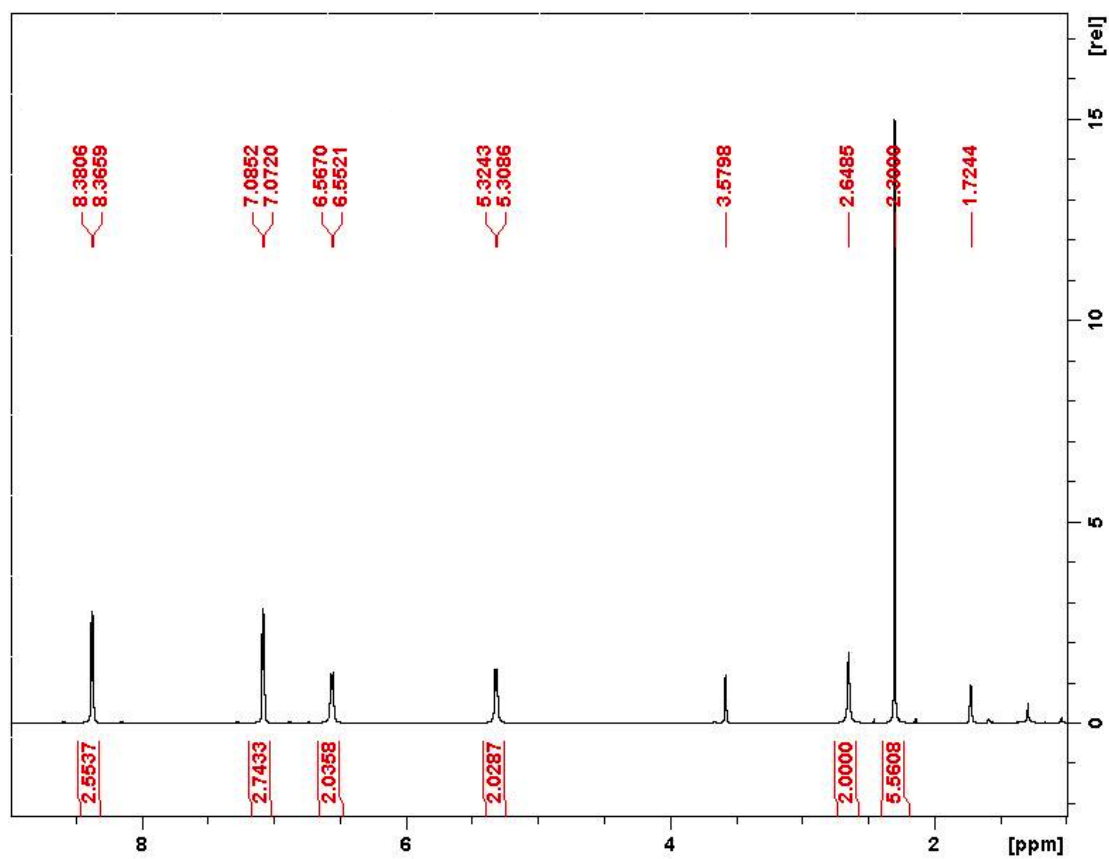

**Fig S2**  $^1\text{H}$  NMR spectrum of complex **3** in  $\text{d}_8\text{-THF}$

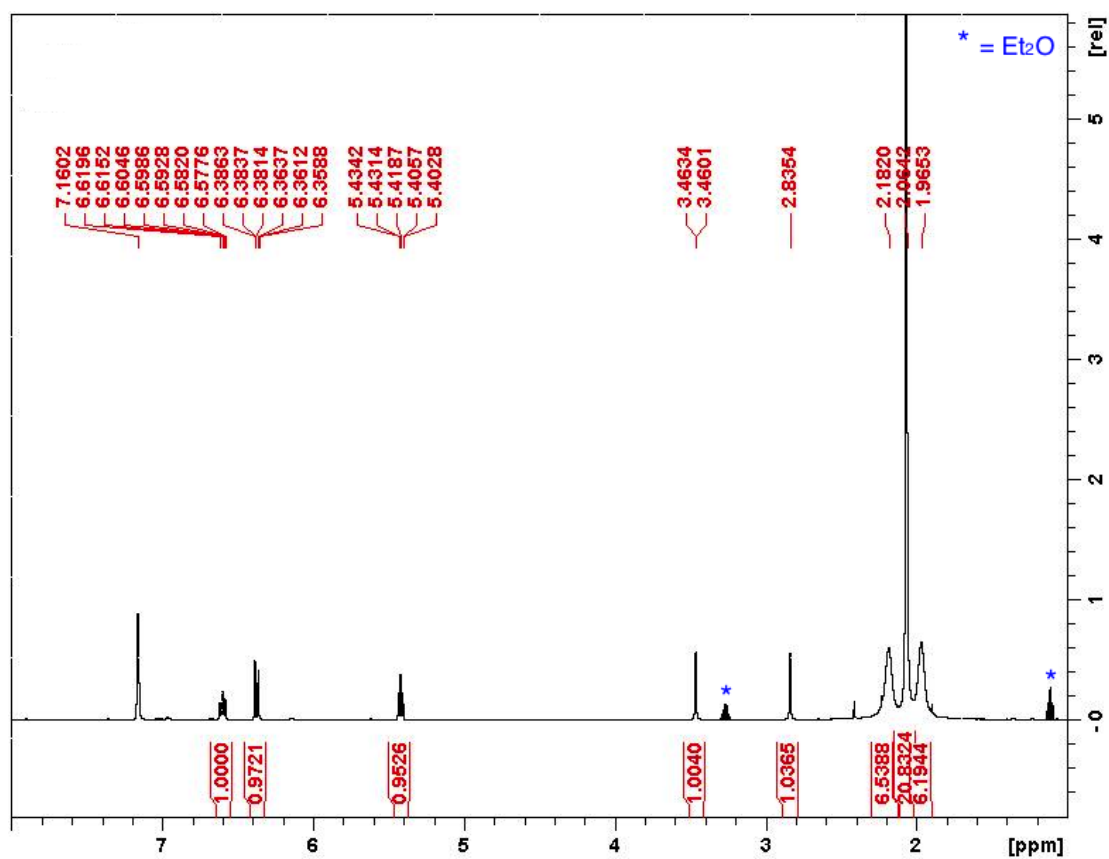

Fig S3 <sup>1</sup>H NMR spectrum of complex 4 in C<sub>6</sub>D<sub>6</sub>

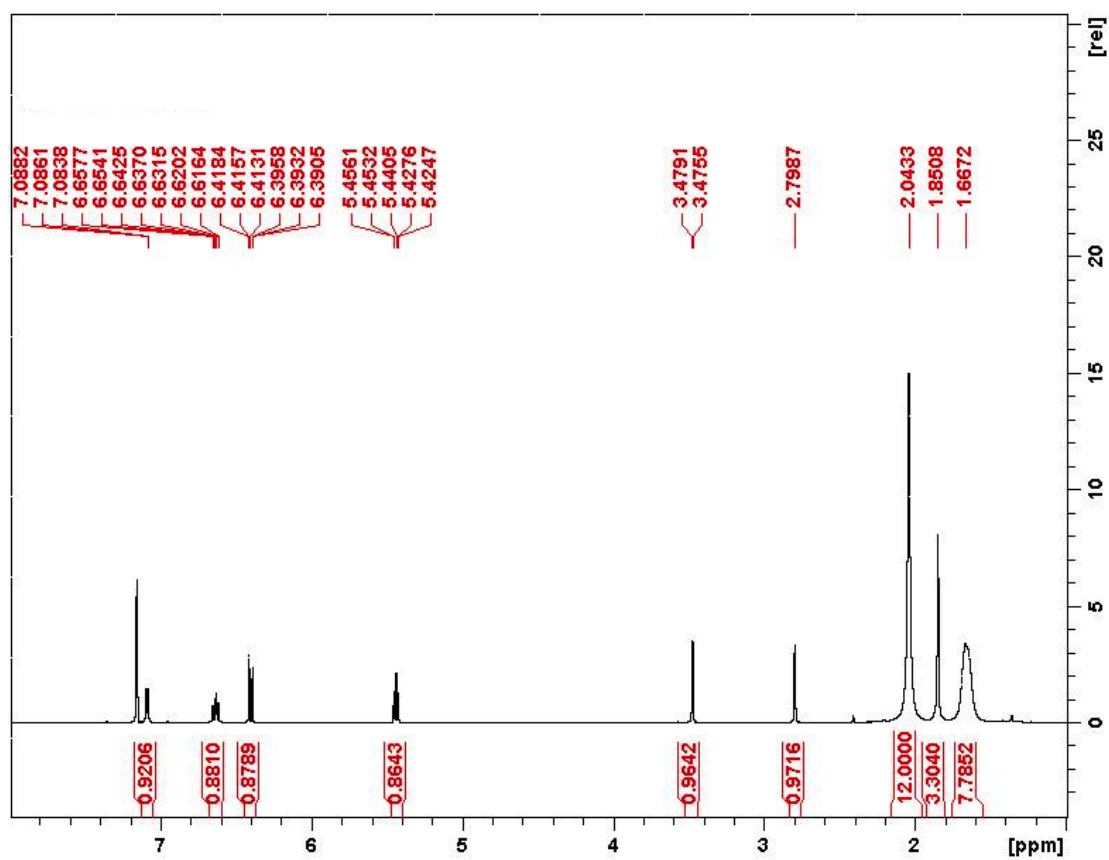

Fig S4 <sup>1</sup>H NMR spectrum of complex 4' in C<sub>6</sub>D<sub>6</sub>

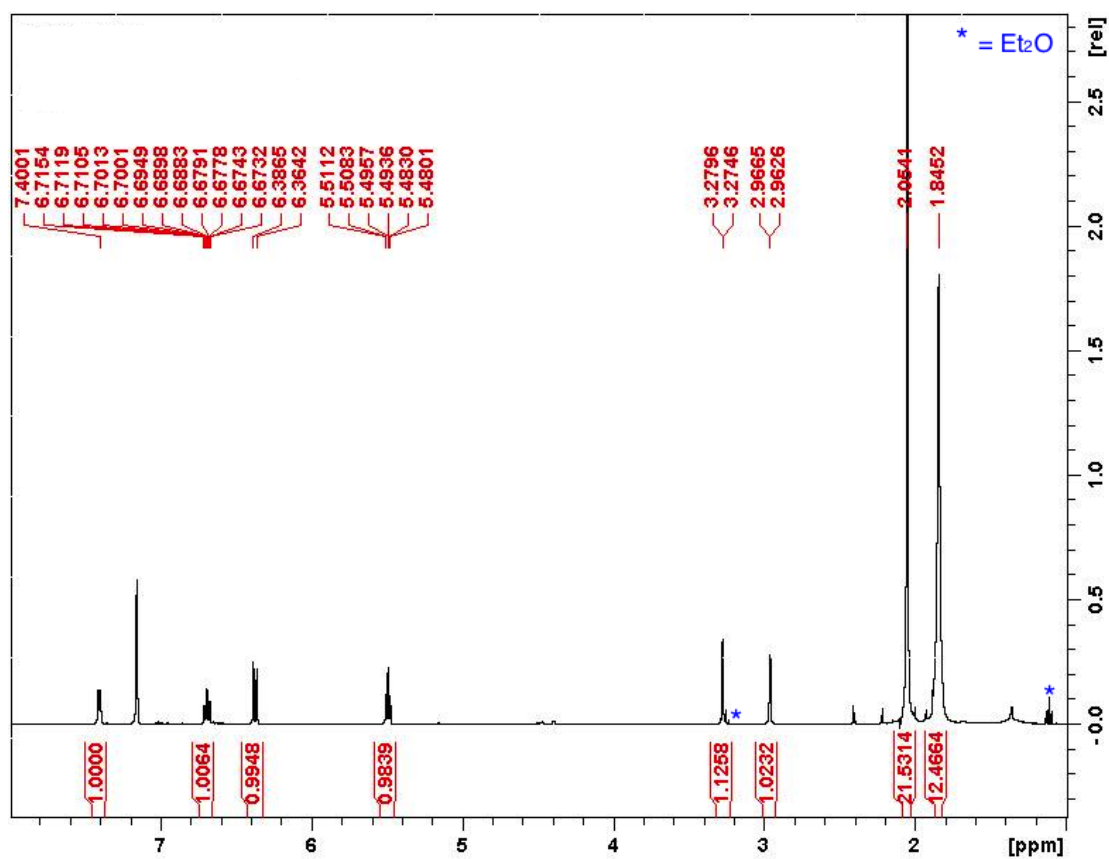

Fig S5  $^1\text{H}$  NMR spectrum of complex **5** in  $\text{C}_6\text{D}_6$

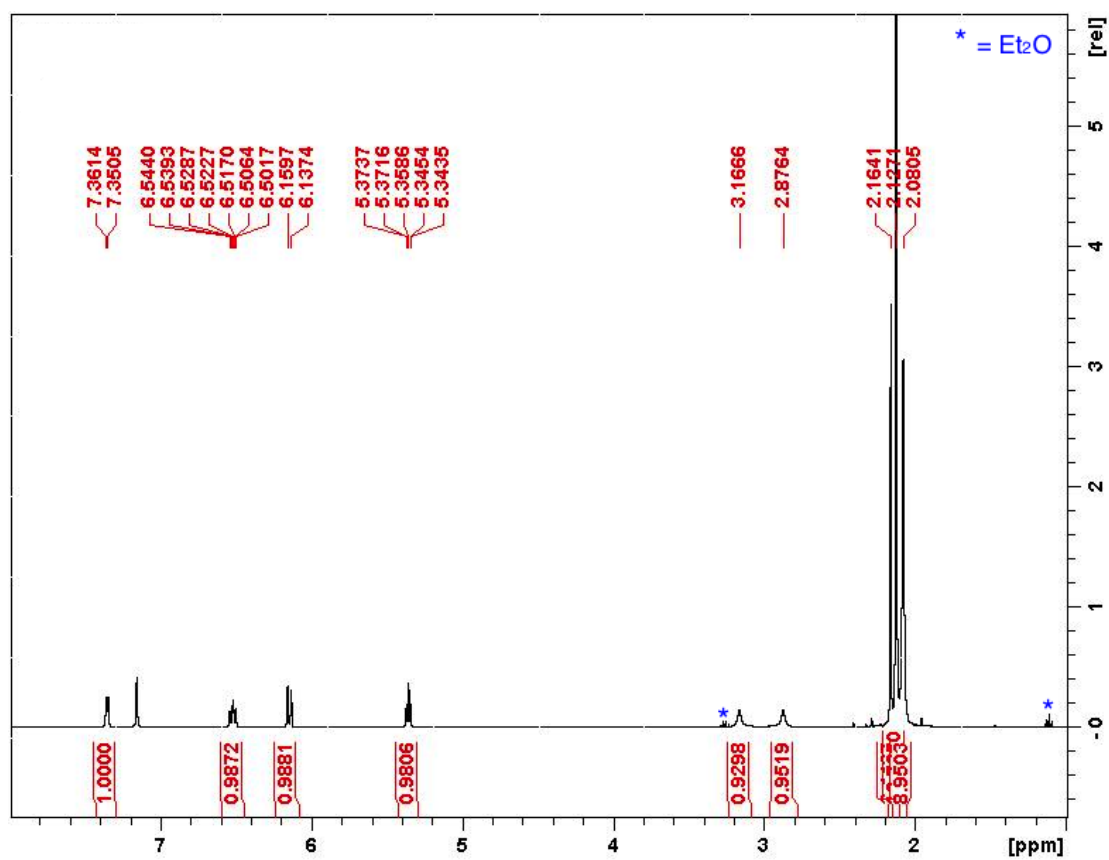

Fig S6  $^1\text{H}$  NMR spectrum of complex **6** in  $\text{C}_6\text{D}_6$

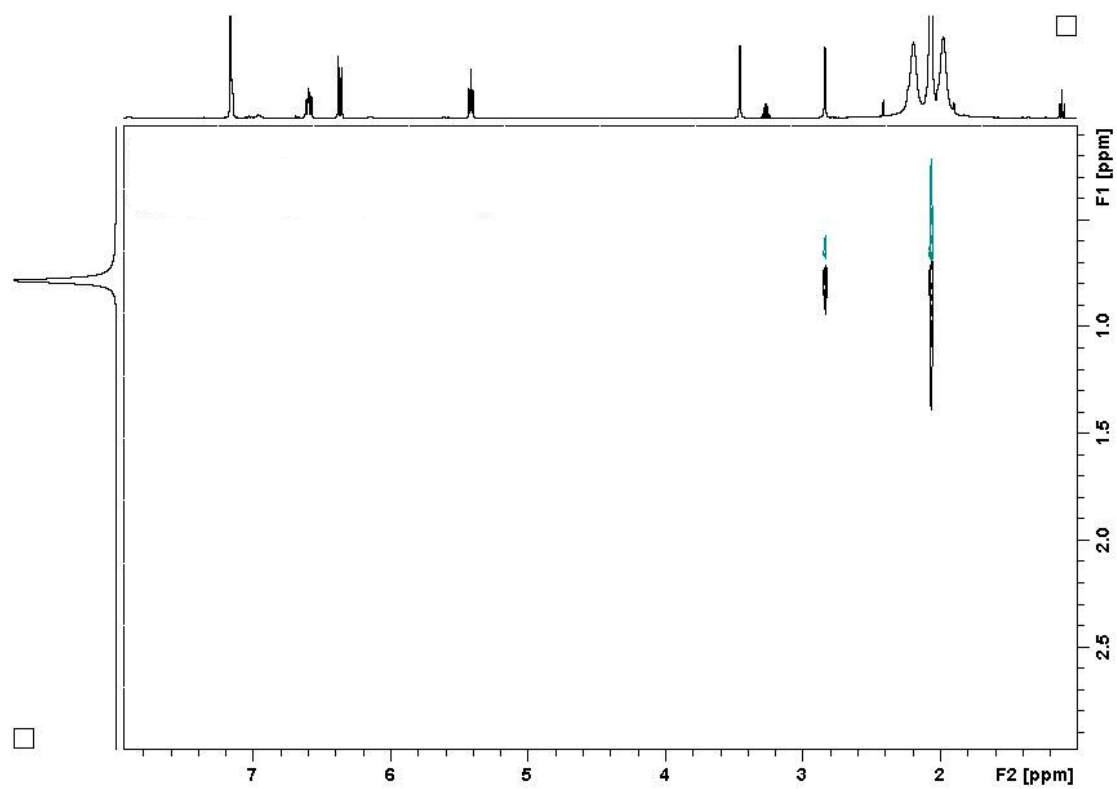

**Fig S7**  $^1\text{H}$ - $^7\text{Li}$  HOESY NMR spectrum of complex **4** in  $\text{C}_6\text{D}_6$

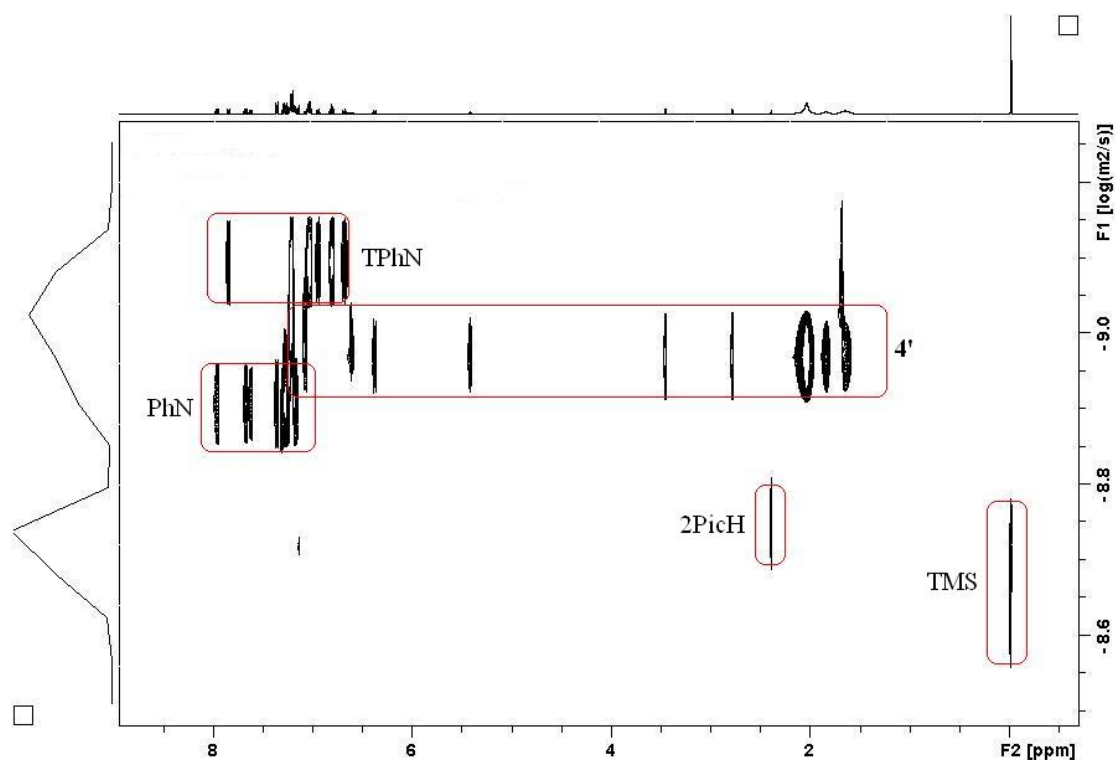

**Figure S8**  $^1\text{H}$  DOSY NMR spectrum of complex **4'** in  $\text{C}_6\text{D}_6$  solution at 300 K in the presence of inert standards 1,2,3,4-tetraphenylnaphthalene (TPhN), 1-phenylnaphthalene (PhN) and tetramethylsilane (TMS).

**Graph S1** Plot of  $\log D$  versus  $\log FW$  from the  $^1\text{H}$  DOSY NMR data obtained for the mixture of **4'** and the inert standards TPhN, PhN and TMS in  $\text{C}_6\text{D}_6$  solution at 300K

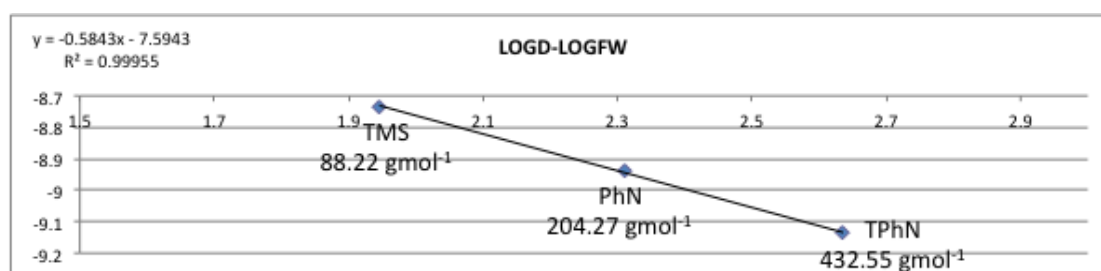

**Table S1** D-FW analysis from the  $^1\text{H}$  DOSY NMR data obtained for the mixture of **4'** and the standards TPhN, PhN and TMS in  $\text{C}_6\text{D}_6$  solution at 300K

| Compound  | $D_{\text{Av}}$ ( $\times 10^{-10} \text{ m}^2\text{s}^{-1}$ ) | $\text{Log } D_{\text{Av}}$ | FW ( $\text{gmol}^{-1}$ ) | $\text{Log FW}$ |
|-----------|----------------------------------------------------------------|-----------------------------|---------------------------|-----------------|
| TPhN      | 7.29                                                           | -9.137272                   | 432.55 <sup>a</sup>       | 2.636036        |
| PhN       | 11.50                                                          | -8.939302                   | 204.27 <sup>a</sup>       | 2.310204        |
| TMS       | 18.47                                                          | -8.733533                   | 88.22 <sup>a</sup>        | 1.945567        |
| <b>4'</b> | 9.72                                                           | -9.012378                   | 267.28 <sup>b</sup>       | 2.426970        |

<sup>a</sup> Real FW <sup>b</sup> FW calculated from [ $\log D = -0.5843 \cdot \log \text{FW} - 7.5943$  ( $r^2 = 0.9995$ )]

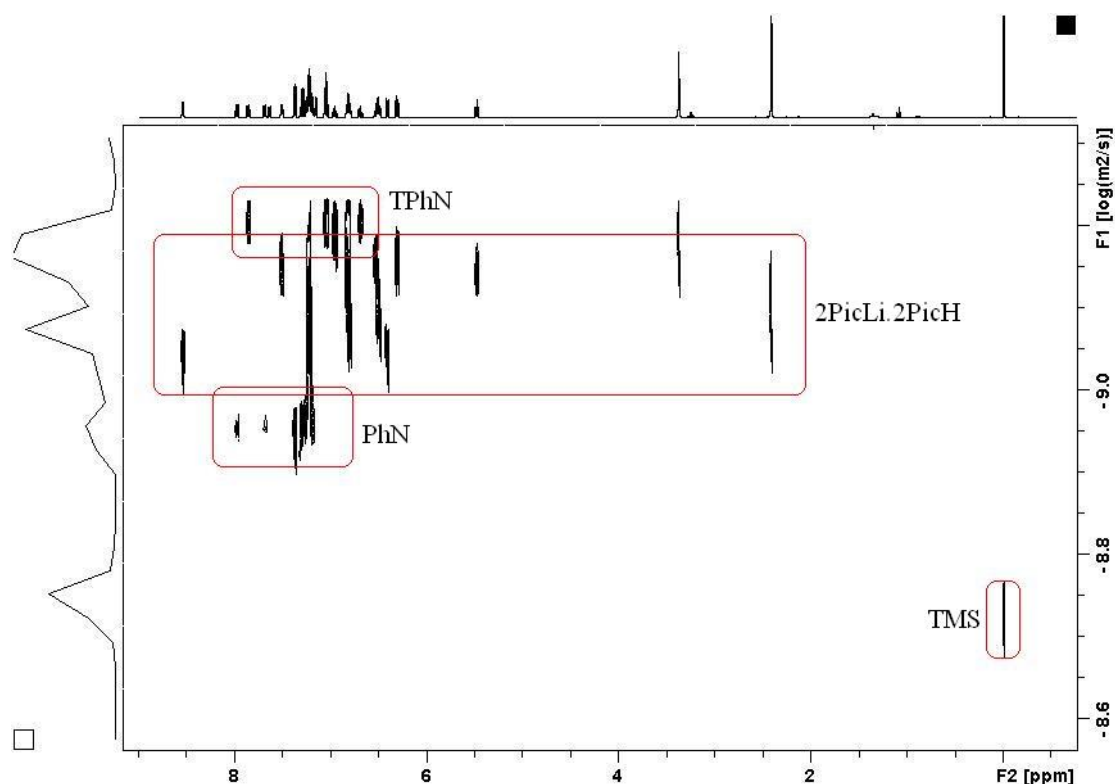

**Figure S9**  $^1\text{H}$  DOSY NMR spectrum of complex 2-picLi•2-picH in  $\text{C}_6\text{D}_6$  solution at 300 K in the presence of inert standards 1,2,3,4-tetraphenylnaphthalene (TPhN), 1-phenylnaphthalene (PhN) and tetramethylsilane (TMS).

**Graph S2** Plot of  $\log D$  versus  $\log FW$  from the  $^1\text{H}$  DOSY NMR data obtained for the mixture of 2-picLi•2-picH and the inert standards TPhN, PhN and TMS in  $\text{C}_6\text{D}_6$  solution at 300K

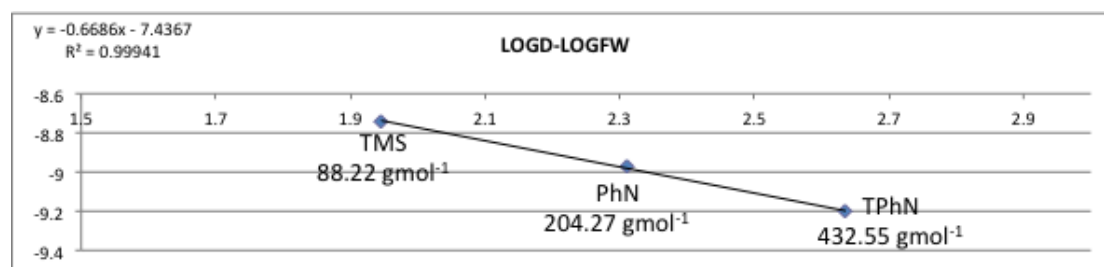



**Table S3** D-FW analysis from the  $^1\text{H}$  DOSY NMR data obtained for the mixture of 2-picLi•2-picH and the standards TPhN, PhN and TMS in  $\text{C}_6\text{D}_6$  solution at 300K

| Compound       | $D_{\text{Av}}$ ( $\times 10^{-10} \text{ m}^2\text{s}^{-1}$ ) | $\text{Log } D_{\text{Av}}$ | FW ( $\text{gmol}^{-1}$ ) | $\text{Log FW}$ |
|----------------|----------------------------------------------------------------|-----------------------------|---------------------------|-----------------|
| TPhN           | 6.27                                                           | -9.202681                   | 432.55 <sup>a</sup>       | 2.636036        |
| PhN            | 10.59                                                          | -8.974899                   | 204.27 <sup>a</sup>       | 2.310204        |
| TMS            | 18.17                                                          | -8.740645                   | 88.22 <sup>a</sup>        | 1.945567        |
| 2-picLi•2-picH | 6.81                                                           | -9.166874                   | 387.04 <sup>b</sup>       | 2.587757        |

<sup>a</sup> Real FW <sup>b</sup> FW calculated from [ $\text{log } D = -0.6686 \cdot \text{logFW} - 7.4367$  ( $r^2 = 0.9994$ )]
